1 Word count 6912 (excluding references)

2

3 A ligand-specific kinetic switch regulates glucocorticoid receptor  
4 trafficking and function.

5

6 Peter J Trebble<sup>1,2</sup>, James M Woolven<sup>3</sup>, Ken A Saunders<sup>3</sup>, Karen D Simpson<sup>3</sup>, Stuart N  
7 Farrow<sup>1,3</sup>, Laura C Matthews<sup>1,2\*</sup>, David W Ray<sup>1,2\*</sup>

8

9

10 Running title: Ligand-specific regulation of GR action

11

12 <sup>1</sup> Manchester Centre for Nuclear Hormone Research in Disease, <sup>2</sup> Centre for Diabetes  
13 and Endocrinology, Institute for Human Development, Faculty of Medical and  
14 Human Sciences, University of Manchester, and Manchester Academic Health  
15 Sciences Centre, Manchester Royal Infirmary, Manchester, M13 9PT, United  
16 Kingdom. <sup>3</sup> Respiratory Therapy Area GlaxoSmithKline, Stevenage, SG1 2NY,  
17 United Kingdom.

18

19 \*Address for correspondence,

20 AV Hill Building, University of Manchester, Manchester M139PT, UK

21 Phone 0161-275-5655

22 Fax 0161-275-5958

23 Email david.w.ray@manchester.ac.uk

24 Email laura.matthews@manchester.ac.uk

25

26 Key words:

27 Nuclear receptor; glucocorticoids; Heat shock protein 90; crystal structure; subcellular  
28 trafficking

29

30 **Abstract**

31 The ubiquitously expressed glucocorticoid receptor (GR) is a major drug target for  
32 inflammatory disease, but issues of specificity, and target tissue sensitivity remain.  
33 We now identify high potency, non-steroidal GR ligands, GSK47867A and  
34 GSK47869A, which induce a novel conformation of the GR ligand binding domain  
35 (LBD) and augment the efficacy of cellular action. Despite their high potency  
36 GSK47867A and GSK47869A both induce surprisingly slow GR nuclear  
37 translocation, followed by prolonged nuclear GR retention, and transcriptional  
38 activity following washout. We reveal that GSK47867A and GSK47869A specifically  
39 alter the GR LBD structure at the HSP90 binding site. The alteration in HSP90  
40 binding site was accompanied by resistance to HSP90 antagonism, with persisting  
41 transactivation seen after geldanamycin treatment. Taken together, our studies reveal  
42 a novel mechanism governing GR intracellular trafficking regulated by ligand  
43 binding, which relies on a specific surface charge patch within the LBD. This  
44 conformational change permits extended GR action, likely due to altered GR-HSP90  
45 interaction. This chemical series may offer anti-inflammatory drugs with prolonged  
46 duration of action due to altered pharmacodynamics rather than altered  
47 pharmacokinetics.

48

49

## 50 **Introduction**

51 Synthetic glucocorticoids (Gc) are potent anti-inflammatory drugs used to treat  
52 multiple conditions including asthma and rheumatoid arthritis (Schett *et al.*,  
53 2008;Krishnan *et al.*, 2009). Unfortunately Gc treatment also carries a wide range of  
54 serious side effects including hyperglycaemia and osteoporosis (Canalis *et al.*, 2002).  
55 In recent years a significant effort has been made to design dissociative ligands with  
56 the anti-inflammatory potency of conventional Gc, but with a reduced spectrum of  
57 side-effects (Lin *et al.*, 2002;Bledsoe *et al.*, 2004;Cerasoli, Jr., 2006;Wang *et al.*,  
58 2006;McMaster and Ray, 2007;McMaster and Ray, 2008;van Lierop *et al.*, 2012).

59  
60 Gc actions are mediated by the ubiquitously expressed glucocorticoid receptor (GR;  
61 NR3C1) a member of the nuclear hormone receptor superfamily with a conserved  
62 modular structure consisting of an N-terminal regulatory domain, a DNA binding  
63 domain (DBD) and a C-terminal ligand binding domain (LBD) (Hollenberg *et al.*,  
64 1985;Encio and tera-Wadleigh, 1991). The unliganded GR resides in the cytoplasm in  
65 a complex with heat-shock proteins and immunophilins (Grad and Picard, 2007).  
66 Ligand binding triggers rapid activation of cytosolic kinase signalling cascades and  
67 concomitantly results in exposure of two nuclear localisation signals (NLS1, and  
68 NLS2) enabling nuclear import (Picard and Yamamoto, 1987). This is accompanied  
69 by replacement of the immunophilin FKBP51 with FKBP52 (Davies *et al.*, 2002)  
70 which associates with dynein to drive GR along microtubules (Czar *et al.*,  
71 1994;Harrell *et al.*, 2004). The process of translocation to the nucleus post ligand  
72 binding occurs rapidly, with the majority of cellular GR being nuclear 30 minutes  
73 after treatment with 100nM Dex (Nishi *et al.*, 1999). In addition cell cycle phase is  
74 able to regulate the subcellular localisation of unliganded GR, but with far slower  
75 kinetics of nuclear accumulation (Matthews *et al.*, 2011). In the nucleus GR binds to  
76 cis-elements to activate or repress target gene expression, recruiting co-modulator  
77 proteins from distinct classes to effect chromatin remodelling, and recruitment of the  
78 basal transcriptional machinery (Ford *et al.*, 1997;Jones and Shi, 2003;Ito *et al.*,  
79 2006;Johnson *et al.*, 2008).

80  
81 GR recruits co-modulator proteins via its transcriptional activation function domains  
82 (AF1, and AF2) (Warnmark *et al.*, 2000;Kumar *et al.*, 2001;Bledsoe *et al.*, 2002). The  
83 GR AF1 is the site of various post translational modifications including

84 phosphorylation, both in the presence and absence of ligand. (Wang *et al.*,  
85 2002;Ismaili and Garabedian, 2004;Galliher-Beckley *et al.*, 2008). Phosphorylation  
86 directs GR function by impacting protein stability and recruitment of specific co-  
87 modulator proteins such as MED14 (Chen *et al.*, 2006;Chen *et al.*, 2008). In addition,  
88 co-modulators bind to the GR AF2 domain, within the LBD (Heery *et al.*, 1997).  
89 Structural information about bound ligand is transmitted through differential folding  
90 of the LBD, which directs GR function by offering differentially attractive signals for  
91 co-modulator recruitment. Both GR agonists and antagonists provoke similar rapid  
92 kinetics of nuclear translocation, but differ in the profile of co-modulator proteins  
93 recruitment, providing a mechanism for their different modes of action (Bledsoe *et*  
94 *al.*, 2002;Kauppi *et al.*, 2003;Stevens *et al.*, 2003).

95

96 Here we identify a novel switch mechanism that regulates GR trafficking in response  
97 to ligand binding, distinct from an effect attributable to ligand potency. We identify  
98 two novel, non-steroidal GR ligands that regulate the GR surface to greatly reduce  
99 rates of nuclear translocation and reduce reliance on heat-shock protein for continuing  
100 activity. The difference in GR conformation induced by the novel GR ligands reveals  
101 a patch of positive charge on the surface of the LBD. We propose that this prevents  
102 efficient engagement with the active nuclear translocation mechanism, subsequent  
103 export, and protein degradation mechanisms for the GR. The result is generation of  
104 ligands with greatly prolonged duration of action as a consequence of altered  
105 pharmacodynamics rather than pharmacokinetics.

106

107

108

109

110

111 **Materials and methods**

112 Anti-hGR (clone 41, BD Biosciences, Oxford, UK); Anti-phospho-(Ser211)-GR, anti  
113  $\alpha$ Tubulin (Cell Signalling Technology, MA, USA); Horseradish peroxidase  
114 conjugated anti-mouse and anti-rabbit (GE Healthcare, Buckinghamshire, UK);  
115 Dexamethasone, Hydrocortisone and Fluticasone Propionate (Sigma, Dorset, UK).  
116 TAT3-Luciferase, and NRE-luciferase have been previously described (Matthews *et*  
117 *al.*, 2008;Matthews *et al.*, 2009).

118

119 *Cell culture and maintenance*

120 HeLa cells and A549 cells (ATCC, Teddington, UK) were cultured in low glucose  
121 (1 g/l) Dulbecco's modified Eagle's medium (DMEM; PAA, Yeovil, UK)  
122 supplemented with stable 2 mM glutamine (PAA) and 10 % heat inactivated fetal  
123 bovine serum (FBS; Invitrogen, Paisley, UK) or 10 % charcoal dextran stripped fetal  
124 calf serum (sFCS; Invitrogen). A549's stably transfected with GRE-Luc and NRE-  
125 Luc were also supplemented with 1% Non essential amino acid (NEAA; Invitrogen)  
126 and 1% Geneticin (Invitrogen). All cells were grown in a humidified atmosphere of  
127 5 % carbon dioxide at 37 °C.

128

129 *Immunoblot analysis*

130 Following treatment cells were lysed in RIPA buffer (50 mM TrisCl pH7.4, 1 %  
131 NP40 (Igepal), 0.25 % Na-deoxycholate 150 mM NaCl, 1 mM EDTA) containing  
132 protease and phosphatase inhibitors (Sigma), and 10  $\mu$ g protein was electrophoresed  
133 on Tris/Glycine 4-12 % gels (Invitrogen) and transferred to 0.2 micron nitrocellulose  
134 membranes (BioRad Laboratories, Hertfordshire, UK) overnight at 4 °C. Membranes  
135 were blocked for 2 hours (NaCl 0.15 M, 2 % dried milk, 0.1 % Tween 20) and  
136 incubated with primary antibodies (diluted in blocking buffer) overnight at 4 °C. After  
137 three 10 minute washes (88 mM Tris pH 7.8, 0.25 % dried milk, 0.1 % Tween 20),  
138 membranes were incubated with a species-specific horseradish peroxidase-conjugated  
139 secondary antibody (diluted in wash buffer) for 1 hour at room temperature, and  
140 washed a further three times, each for 10 minutes. Immunoreactive proteins were  
141 visualised using enhanced chemiluminescence (ECL Advance, GE Healthcare).

142

143 *Reporter gene assays*

144 HeLa cells seeded in DMEM containing sFCS were co-transfected with 2 µg reporter  
145 gene and 0.5 µg CMV-renilla luciferase (to correct for transfection efficiency) using  
146 Fugene 6 (Roche Diagnostics, West Sussex, UK) at a ratio of 3:1 (v/w). 24 hours post  
147 transfection, cells were treated as specified in results prior to lysis, then assayed for  
148 luciferase activity using a dual-luciferase reporter assay system following the  
149 manufacturer's instructions (Promega, Southampton, UK).

150 Stable A549 GRE-Luc or NRE-Luc cells were seeded in DMEM containing sFCS  
151 into 96 well plates and incubated overnight. Cells were treated as specified in results  
152 and 18 hours later each well washed twice with PBS (first without  $Mg^{2+}$ ,  $Ca^{2+}$ , then  
153 with  $Mg^{2+}$ ,  $Ca^{2+}$ ). Renilla Glo (Promega, E2720) or Bright Glo (Promega E2620) lysis  
154 buffer was added the GRE cells or the NRE cells respectively according to the  
155 manufacturer's instructions. Cell lysates were read using a luminometer (Wallac 1450  
156 MicroBeta Trilux Liquid Scintillation counter and luminometer). Ten one second  
157 reads were taken per well and the average RLU determined.

158

159 *Immunofluorescence*

160 *Fixed cells:* Following 24 hours in DMEM containing sFCS, HeLa cells were  
161 transfected (Fugene 6) with hGR-GFP and treated as specified in results. Cells were  
162 fixed with 4 % paraformaldehyde for 30 minutes at 4 °C, and subsequently stained  
163 with Hoeschst (Sigma) in PBS (2 µg/ml) for 20 minutes at 4 °C. Following three 5  
164 minute washes in PBS, coverslips were mounted using Vectamount AQ (Vector  
165 Laboratories, Peterborough, UK). Images were acquired on a Delta Vision RT  
166 (Applied Precision, GE Healthcare) restoration microscope using a 40X/0.85 Uplan  
167 Apo objective and the Sedat Quad filter set (Chroma 86000v2, VT, USA). The images  
168 were collected using a Coolsnap HQ (Photometrics, AZ, USA) camera with a Z  
169 optical spacing of 0.5µm. Raw images were then deconvolved using the Softworx  
170 software (GE Healthcare) and average intensity projections of these deconvolved  
171 images processed using Image J (Rasband, 1997).

172

173 *Live cells:* Following 24 hours in DMEM containing sFCS, HeLa cells were  
174 transfected (Fugene 6) with 5µg GR-GFP and transferred to a glass bottomed 24 well  
175 plates. Alternatively HeLa cells were plated into a glass bottomed 24 well plate in

176 DMEM containing sFCS. Each well was transfected (Fugene 6) with 0.5 $\mu$ g HaloTag-  
177 GR (Catalog number FHC10483, Promega) and incubated for 16 hours with 0.25 $\mu$ l  
178 Halo ligand (HaloTag TMRDirect, Catalog number G2991, Promega) to enable  
179 visualisation. Subcellular GR trafficking was tracked in real time at 37°C with 5%  
180 CO<sub>2</sub>. Images were acquired on a Nikon TE2000 PFS microscope using a 60x/ 1.40  
181 Plan Apo or 40x/1.25 Plan Apl objective and the Sedat filter set (Chroma 89000). The  
182 images were collected using a Cascade II EMCCD camera (Photometrics). Raw  
183 images were then processed using Image J.

184

#### 185 *Fluorescent recovery after photobleaching (FRAP)*

186 HeLa cells were transfected (Fugene 6) with 5  $\mu$ g hGR-GFP then seeded into a glass  
187 bottomed 24 well plate. Cells were maintained at 37°C and 5% CO<sub>2</sub> and images  
188 collected on a Leica TCS SP5 AOBS inverted confocal (Leica, Milton Keynes, UK)  
189 using a 63x/ 0.50 Plan Fluotar objective and 7x confocal zoom. The confocal settings  
190 were as follows, pinhole 1 airy unit, scan speed 1000Hz unidirectional, format 1024 x  
191 1024. Images were collected using the following detection mirror settings; FITC 494-  
192 530nm using the 488nm (13%).

193

#### 194 *MTS Assay*

195 Cells were seeded into a 96 well plate were treated as described in the results. Upon  
196 completion of the treatment 10  $\mu$ l of MTS reagent (Promega) was added to each well.  
197 Cells were incubated for 4 hours, reading at 490nm every hour.

198

#### 199 *Q-RTPCR*

200 Cells were treated as required, then lysed and RNA extracted using an RNeasy kit  
201 (Qiagen). 10 ng RNA was reverse transcribed, and subjected to qPCR using Sybr  
202 Green detection in an ABI q-PCR machine (Applied biosystems, CA, USA) and data  
203 analysed by  $\delta\delta$ CT method (Livak and Schmittgen, 2001).

204

#### 205 *Bioluminescence real-time recording*

206 HeLa cells transfected (Fugene 6) with 2 $\mu$ g TAT3-luc plasmid were grown to 80%  
207 confluency in 35-mm tissue culture dishes in phenol red free DMEM with 10% FCS  
208 and 1% glutamine. Prior to the experiment, cells were supplemented with 0.1 mM

209 Luciferin substrate (Izumo *et al.*, 2003; Yamazaki and Takahashi, 2005). Each dish lid  
210 was replaced with a glass cover then sealed with vacuum grease before being placed  
211 in a light-tight and temperature-controlled (37°C) environment. Light emission  
212 (bioluminescence) was measured continuously using a Photomultiplier tube (PMT,  
213 H6240 MOD1, Hamamatsu Photonics, Hertfordshire, UK). Baseline measurements  
214 (photon counts per minute) were taken for each PMT prior to treatment and then  
215 deducted from the experimental values attained.

216

#### 217 *Measurement of ligand uptake using mass spectroscopy*

218 A549 cells were grown to 90% confluency in 6 well plates. Following treatment the  
219 media was removed from the cells and retained for analysis. The cells were washed  
220 three times with PBS and lysed in 300µl of M-Per mammalian protein extraction  
221 reagent (#78503, ThermoScientific, Essex, UK) on the shaker at 750rpm at room  
222 temperature for 5 minutes. The whole cell lysate was collected, then centrifuged at  
223 10000rpm for 10 minutes, then the supernatant collected and analysed by mass  
224 spectrometry.

225

#### 226 *Measurement of cytokine production*

227 A549 cells were seeded into a 96 well plate into DMEM with 10% FCS and  
228 incubated overnight. In order to slow cell proliferation and prevent any interference  
229 from steroid present in FCS the media was changed to DMEM with 1% sFCS prior to  
230 ligand treatment. Following treatment supernatants were collected and assayed for IL6  
231 and IL8 concentration using a Luminex 100 (Merck Millipore, MA, USA) with  
232 StarStation software according to the manufacturer's instructions.

233

#### 234 *Computational modelling of GR crystal structure*

235 Crystal structures of GR bound to Dex (1M2Z) and GSK47866A (3E7C) (Madauss *et al.*,  
236 2008) were downloaded from the RCSB Protein Data Bank (PDB) (Berman *et al.*,  
237 2007). The structures were imported into Maestro (Schrodinger, 2012) and prepared  
238 using the Protein Preparation module. Each Ligand was extracted and scrambled  
239 conformationally before docking back into the native active site models to verify that  
240 the docking program (GLIDE) (Schrodinger, 2009) was competent at reproducing the  
241 x-ray pose for each complex.



242 Models of compounds GSK47866A, GSK47867A and GSK47869A (S-isomers) were  
243 prepared using the Ligprep module and a set of 272 conformers generated using the  
244 confgen module of Maestro. This set of conformers was docked in the 3E7C active  
245 site model yielding 62 successful poses. Again, as found in the bootstrapping  
246 exercise, GSK47866A best scoring pose was extremely close in conformation and  
247 position within the active site pocket (RMSD ~0.2), indicative of a robust model.  
248 Crystal structures 1M2Z and 3E7C were superposed and conformations of residues  
249 within 6 Angstrom of the Dex ligand in 1M2Z were compared visually. Any differing  
250 substantially were coloured differently (Fig. 2A, B), and these atom colours projected  
251 onto a molecular surface to reveal regions of the protein surface impacted by the  
252 residue movements induced by binding of GSK47866A (Fig. 3A,C). The regions of  
253 surface modification thus highlighted guided where to look for differences in  
254 electrostatic potential, projected onto the same molecular surface (Fig. 3B,D)

255

#### 256 *Modelling of GR mutant with impaired HSP90 interaction*

257 The original 1M2Z x-ray coordinates, already optimised for use with the OPLS  
258 forcefield in Maestro, were used to mutate M604 to Threonine. The built-in residue  
259 mutation building tool was employed for this. The mutated structure was optimised  
260 using the Protein Preparation Wizard option to perform a restrained, all-atom  
261 minimisation. Surface and electrostatic potential colouring was calculated as for all  
262 other examples, ensuring a consistent range of electrostatic potential values of -0.2 to  
263 0.2 for the blue-white-red colour ramp.

264

265 **Results**

266 *GSK47867A and GSK47869A, are highly potent GR agonists*

267 There is wide interest in understanding how variation in ligand structure (Fig. 1A)  
268 affects the function of GR. Here, we use novel, non-steroidal glucocorticoid receptor  
269 ligands (NSG) with very high potency, and specificity for GR to determine how  
270 ligand structure impacts receptor function (Fig. 1, B-C Fig. S1). Transient GR  
271 transactivation and transrepression models in HeLa cells were used initially to  
272 compare the NSGs to conventional synthetic Gc ligands. We find that both  
273 GSK47867A and GSK47869A were approximately 30 times more potent than  
274 Dexamethasone (Dex, Fig. 1B-C, table 1). Similar results were also obtained using  
275 A549 cells with stably integrated GRE-Luc or NFκB-Luc templates (Fig. S2A-B).  
276 The steroidal Gc Fluticasone Propionate (FP) had similar potency to GSK47867A and  
277 GSK47869A. Hydrocortisone was significantly less potent than all the synthetic  
278 ligands tested (Fig. 1).

279

280 To rationalise subsequent matched analyses, saturating concentrations of the ligands  
281 were selected, calculated as 10 times the measured EC<sub>50</sub> for transactivation (Table 1).  
282 At these concentrations all ligands showed similar repression of IL6 and IL8 secretion  
283 (Fig. S2C-D), and inhibition of cell proliferation (Fig. S2E-F).

284

285 *GR crystal structure reveals ligand-specific altered surface charge*

286 To identify conformational differences in the GR ligand binding domain (LBD), we  
287 first compared the structures of GR-Dex (1M2Z) and GR-GSK47866A (3E7C) a non-  
288 steroidal GR ligand similar in structure to GSK47867A (Figs 1A, 2). An active site  
289 model derived from the coordinates of deposited structure 3E7C was used to dock  
290 GSK47867A and GSK47869A. Both GSK47867A and GSK47869A are similar to  
291 GSK47866A and gave very high scoring fits in the binding pocket formed by  
292 GSK47866A bound to the GR LBD (Fig. S3). Inspection of the poses showed  
293 sensible, well fitting conformers, indicating that structure 3E7C was a suitable  
294 surrogate to compare with 1M2Z.

295

296 Observation of the ligand binding pocket in each crystal structure revealed that amino  
297 acids in closest proximity to each ligand demonstrated significant movement  
298 compared to Dex at the head (A ring, Fig. 2C-D) and tail (D ring, Fig. S4C-D). The

299 greatest displacement was seen in amino acids Gln570 and Arg611 (Fig. 2C-D). Less  
300 displacement was seen at the opposite end of the ligand; most noticeable here was the  
301 movement of Gln642 (Fig. S4C-D). The effect of residue movements in the GR LBD  
302 upon binding of GSK47866A was examined by visualisation of the molecular surface  
303 (Fig. 3, Fig. S5 and S6). This revealed a distinct surface electrostatic potential  
304 difference, highlighting a patch of positive charge in the GR-GSK47866A structure  
305 resulting from displacement of Arg611 (Fig. 3 B,D). This demonstrates that the  
306 structural difference between Dex and the NSGs results in a different GR surface  
307 charge upon binding, with potential for altered for protein-protein interactions.

308

### 309 *NSG induce different kinetics of endogenous Gc target gene regulation*

310 To determine whether the alteration in GR surface charge upon binding NSG had any  
311 functional consequence, transcript levels of endogenous Gc induced (GILZ and  
312 FKBP5) and Gc repressed (IL6 and IL8) target genes were quantified at multiple time  
313 points (Fig. 4A-B, Fig. S7A-B). Both the steroidal and NSG ligands displayed  
314 equivalent kinetics of FKBP5 induction (Fig. 4A). Although NSG treatment did not  
315 induce GILZ transcript at 1 hour, similar induction was observed at later time points  
316 (Fig. 4B). Similarly NSG treatment did not repress IL6 or IL8 transcripts at 1 hour but  
317 comparable repression was observed at later time points (Fig. S7A-B).

318

### 319 *NSG treatment results in delayed kinetics of GR 211 phosphorylation*

320 Transactivation of IGFBP1 is reliant on Ser211 phosphorylation of the GR, a signal to  
321 recruit the co-activator protein MED14. Dex treatment resulted in significant  
322 induction of IGFBP1 transcript by 1 hour (Fig. S8A), but the NSG ligands failed to  
323 induce transcript at this early time point. This lack of transcript regulation at an early  
324 time point was similarly seen with GILZ, IL6 and IL8. Ligand induction of GR  
325 Ser211 phosphorylation was compared. Treatment with Dex resulted in rapid  
326 phosphorylation of GR at both serine residues 203 and 211 (Fig. S8B). The NSG  
327 ligands induced slower onset of phosphorylation of both serine residues 203 and 211  
328 (Fig. S8B).

329

### 330 *NSG treatment results in slow rate of GR nuclear translocation*

331 The delay in endogenous gene transactivation and receptor phosphorylation seen with  
332 NSG treatment suggested that nuclear translocation may also be delayed. Use of a

333 halo tagged GR clearly demonstrated a slower rate of nuclear translocation with both  
334 GSK47867A and GSK47869A (Fig. 4C). Ligand-bound nuclear GR has a signature  
335 FRAP signal, with reduced intranuclear mobility resulting in delayed recovery from  
336 photobleaching. FRAP studies revealed that at 1 hour following NSG treatment  
337 nuclear GR displayed characteristics of an unliganded receptor (Fig. S9A-B).  
338 However with 4 hour NSG treatment nuclear GR displayed the typical signature of  
339 liganded receptor, indicative of a delay in adoption of the activated GR conformation  
340 (Fig. S9C-D).

341 Altered kinetics of GR phosphorylation may explain the observed differences in  
342 nuclear translocation rate and transactivation of endogenous Gc target genes.  
343 Therefore, we made GR mutants Ser211Ala (phosphodeficient) and Ser211Asp  
344 (phosphomimetic) to assess the importance of this phosphorylation site (Fig. S10A).  
345 However, the phosphomimetic GR did not significantly increase the rate of GR  
346 translocation with either GSK47867A or GSK47869A treatment (Fig. S10C-D).  
347 Likewise the phosphodeficient GR had no significant impact on the rate of  
348 translocation seen with Dex treatment (Fig. S10B, D).

349

#### 350 *NSG treatment results in slower onset of GR transactivation*

351 Treatment with NSG results in slowed GR nuclear translocation and delayed  
352 transactivation of endogenous Gc target genes. To measure the kinetics of GR  
353 transactivation more precisely, real-time luciferase analysis was used (Meng *et al.*,  
354 2008;McMaster *et al.*, 2008) (Fig. 4D). This revealed that the NSG ligands  
355 consistently took longer to reach half-maximal transactivation compared to either  
356 Dex, or the higher potency FP (Fig. 4E). Interestingly all three high potency ligands  
357 resulted in greater maximal transactivation (Fig. 4D).

358

#### 359 *Delayed action of NSG ligands cannot be explained by impaired cellular uptake*

360 One possible explanation for these observations is altered ligand access to the  
361 intracellular GR. Initially mass spectroscopy analysis of cell lysates was performed  
362 after 10 minutes ligand exposure (Fig. 5A). A 10 $\mu$ M concentration of each ligand  
363 was compared, to permit detection of the ligand by mass spectrometry in cell lysates.  
364 Strikingly, the NSG ligands showed greater than 10 fold increased concentrations  
365 within the cells compared to Dex, effectively ruling out delayed ligand penetration.

366 To further evaluate cell pharmacokinetics, cells were incubated with 100 nM Dex or  
367 3 nM FP, GSK47867A or GSK47869A for 10 minutes, washed and then incubated in  
368 ligand-free medium for 4 hours. These samples were compared to cells treated with  
369 ligand continuously for 4 hours (Fig. 5B-D). Short exposure to both NSG ligands  
370 resulted in greater induction of GILZ and FKBP5 although not IGFBP1 compared to  
371 Dex, again demonstrating rapid cellular accumulation of ligand. Furthermore cells  
372 incubated with NSG on ice for 1 hour to permit ligand access in the absence of GR  
373 activation still showed delayed nuclear translocation (Fig. 5E-F), implicating a post  
374 receptor mechanism of action. The observed differences could not be attributed to  
375 Dex activation of mineralocorticoid receptor, as the mineralocorticoid receptor  
376 antagonist Spironolactone did not affect the Dex induction (Fig. S11A-B).

377

#### 378 *NSG bound GR shows prolonged nuclear retention*

379 As treatment with both NSG ligands results in delayed nuclear translocation, we  
380 investigated whether nuclear export of GR may also be slower. To measure GR export  
381 HeLa cells were treated with 100 nM Dex or 3 nM NSGs for 1 hour then washed and  
382 placed in serum free media and imaged over 24 hours (Fig. S12A). In cells treated  
383 with NSG the GR-GFP was not exported from the nucleus during the 24 hour wash-  
384 out period, but Dex treated cells exported GR from the nucleus within 6 hours (Fig.  
385 S12B).

386

#### 387 *Structural modelling suggests that NSGs modify the HSP90 interaction surface*

388 Our data clearly demonstrates that when bound to NSG there is altered interaction of  
389 GR with the translocation machinery resulting in delayed nuclear import, delayed  
390 transcriptional activity and receptor export. The chaperone heat shock protein 90  
391 (HSP90) is known to play key roles in this aspect of GR biology, including  
392 maintaining GR structure, ligand binding activity, and trafficking of GR between  
393 nucleus and cytoplasm (Segnitz and Gehring, 1997;Tago *et al.*, 2004;Kakar *et al.*,  
394 2006;Grad *et al.*, 2007;Echeverria *et al.*, 2009). GR residues identified by Ricketson  
395 and co-workers (Ricketson *et al.*, 2007) as important for HSP90 interaction were  
396 mapped onto the crystal structure of GR bound to Dex (Fig. 6A). Surface map  
397 analysis of GR following replacement of Met604 with Thr604, which has been shown  
398 to inhibit HSP90 recruitment, was in the same part of the GR structure that was  
399 differentially affected by NSG binding (Fig. 6B, C).

400

401 *Microtubule disruption improves nuclear translocation rate*

402 HSP90 anchors the GR to the microtubule network, so permitting rapid, energy-  
403 dependent nuclear translocation. HSP90 antagonism slows the rate of nuclear  
404 translocation (Galigniana *et al.*, 1998). However, in addition, GR can translocate  
405 using a diffusion mechanism (Nishi *et al.*, 1999). Disruption of the microtubule  
406 network using colcemid restores rapid GR translocation even in the presence HSP90  
407 inhibitor geldanamycin (Segnitz *et al.*, 1997;Galigniana *et al.*, 1998). Therefore, we  
408 used colcemid to determine if the microtubule architecture was slowing NSG  
409 mediated nuclear translocation. Colcemid significantly increased the rate of NSG-  
410 driven nuclear translocation, but had no effect on that promoted by Dex (Fig. 6D-G),  
411 suggesting a diffusion mechanism for translocation

412

413 *NSGs mediate prolonged duration of action*

414 The duration of ligand-dependent activity depends on continuing presence of ligand,  
415 and maintaining GR in a ligand-binding compatible conformation. To investigate  
416 these phenomena we initially undertook washout studies, using real time reporter gene  
417 luciferase analysis. These revealed a striking prolongation of transactivation following  
418 NSG ligand withdrawal compared to either Dex or FP, which was not explained by  
419 increased ligand potency (Fig. 7A).

420 To corroborate these observations with endogenous genes a two hour ligand exposure  
421 was chased with a 24 hour washout before measurement of GILZ and FKBP5  
422 transcripts (Fig 7B-C). There was significantly enhanced preservation of  
423 transactivation seen with both the NSGs compared to the potency matched control  
424 steroid FP.

425 To determine the role of HSP90 in mediating prolonged GR transactivation,  
426 geldanamycin was used. As HSP90 activity is required for initial GR ligand binding,  
427 these studies were performed sequentially, adding geldanamycin after ligand  
428 activation. The geldanamycin was added to cells at the time of maximal  
429 transactivation, in the presence of continuing ligand exposure (Fig. 7D). Both FP and  
430 Dex showed exponential decay of transactivation, as predicted. However, the NSG  
431 ligands showed a striking biphasic response, with initial potentiation, followed by  
432 decay (Fig. 7D).

433 As HSP90 is also essential for maintaining GR protein stability investigation of  
434 receptor abundance and phosphorylation was undertaken. Inhibition of HSP90  
435 preserves GR protein levels following Dex treatment for 4 hours (Fig. 7E), but not at  
436 a later time point (Fig. 7F). Strikingly, the NSG ligands did not show such a ligand-  
437 dependent loss of GR protein (Fig. 7E,F), again identifying differences in HSP90  
438 interaction with the novel NSGs. Additionally treatment of cells with Dex in the  
439 presence of geldanamycin results marked dephosphorylation of GR at serine 211 (Fig.  
440 7E). However treatment with the NSG was protective for serine 211 phosphorylation  
441 (Fig. 7E). Collectively, these studies suggest that GR-HSP90 interactions can be  
442 modulated by ligand structure, to influence the properties of the Gc response.

443

444

445



446 **Discussion**

447 Understanding how the GR interprets its ligands to permit appropriate cellular  
448 responses is of vital interest in both physiology and pharmacology, as the GR remains  
449 an important drug target in inflammation and malignancy (Barnes, 2011;De *et al.*,  
450 2011). The advent of drug design based on the crystal structure predicted  
451 pharmacophore has permitted new generations of ligands to be synthesised, including  
452 those studied here (Kauppi *et al.*, 2003;Bledsoe *et al.*, 2004). Our initial findings  
453 identified that although highly potent, the NSG ligands surprisingly result in slowed  
454 kinetics of GR phosphorylation, nuclear import and delayed onset of GR-dependent  
455 gene transactivation. Our data suggests that the NSG ligands fundamentally alter the  
456 mechanism of GR activation.

457

458 A possible explanation for the delayed kinetics of cellular response to GSK47867A  
459 and GSK47869A is reduced efficiency of cellular uptake of ligand. Although the  
460 NSGs retain the highly lipophilic characteristics of steroidal ligands, they may interact  
461 differentially with membrane components. However our mass spec studies in fact  
462 showed an accelerated ligand accumulation with the NSGs compared to Dex. We  
463 also undertook a functional assay, washing off ligand after a short incubation, and  
464 tracking response of Gc target genes. Again, the NSGs produced enhanced target gene  
465 transactivation compared with Dex, indicating rapid ligand accumulation.  
466 Furthermore treatment of cells with ligand for 1 hour on ice allowed for saturation of  
467 the receptor without translocation. When the cells were returned to 37°C the GR  
468 rapidly translocated with both Dex and FP but translocation was slower for both the  
469 NSG ligands, supporting defective interaction with the nuclear translocation  
470 machinery post ligand binding.

471

472 To explain these observations we interrogated the crystal structure of GR LBD bound  
473 to GSK47867A and GSK47869A. This revealed a very similar conformation to that  
474 seen with Dex, but there was single difference, namely the addition of a patch of  
475 positive charge on the external surface of the LBD. Ricketson and co-workers were  
476 able to demonstrate, through amino acid substitution, that this surface is required for  
477 HSP90 interaction (Ricketson *et al.*, 2007). HSP90 recognises the GR LBD through  
478 two, defined hydrophobic sites and binds to a solvent accessible major groove  
479 maintaining GR stability and permitting high-affinity ligand binding (Fang *et al.*,



480 2006), as depicted in Fig. 7G. Following ligand binding HSP90 undergoes a  
481 conformation change to bind to the same region of the GR LBD, but with a different  
482 motif. This is required to couple the GR to the dynein active transport mechanism  
483 through the bridging effect of immunophilins (Harrell *et al.*, 2004)(Fig. 7G). HSP90  
484 remains associated with the GR in the nucleus, where binding to the major groove of  
485 the GR LBD competes with recruitment of co-activators (Caamano *et al.*, 1998;Kang  
486 *et al.*, 1999;Fang *et al.*, 2006), and also promotes nuclear retention (Tago *et al.*,  
487 2004;Kakar *et al.*, 2006). Binding of NSGs to the GR LBD forces the movement of  
488 Arg611, leading to the creation of a novel interaction surface which could be the  
489 mechanism by which interaction with HSP90 is altered. Therefore, we measured the  
490 impact of HSP90 manipulation on GR function with both the steroidal ligands, and  
491 NSGs.

492

493 GR is anchored to the microtubule network through interaction with HSP90 to  
494 facilitate nuclear translocation. Antagonism of HSP90 therefore reduces the rate of  
495 GR nuclear translocation and can be overcome by disrupting the microtubule network  
496 (Galigniana *et al.*, 1998;Nishi *et al.*, 1999). Here we show that the absence of an intact  
497 microtubule network significantly increases the rate of GR translocation in response  
498 to the NSGs but not Dex, which suggests an impaired interaction of GR-NSG with  
499 HSP90. Evidence has emerged that persisting Gc action requires cycles of  
500 dissociation, and re-binding of ligand to the GR, which occurs in a HSP90 dependent  
501 manner (Stavreva *et al.*, 2004;Conway-Campbell *et al.*, 2011)(Fig. 7G). To test the  
502 role of HSP90 we used the inhibitor geldanamycin (Segnitz *et al.*, 1997). As  
503 predicted, geldanamycin curtailed the Gc transcriptional response rapidly, irrespective  
504 of ligand potency, for the two steroid agonists. However, in keeping with the  
505 hypothesis that HSP90 binding was disrupted by the final conformation adopted by  
506 the NSG bound GR there was greatly prolonged transactivation observed, with a  
507 gradual decay likely due to degradation of GR protein. It was, however, striking that  
508 the pattern of response for both NSGs included an initial augmentation of response,  
509 which is compatible with displacement of HSP90 from the major groove, and  
510 subsequent promotion of co-activator recruitment. It is also possible that disruption of  
511 the HSP90 interaction surface also affects interaction between GR, and co-modulator  
512 protein partners (Caamano *et al.*, 1998;Kang *et al.*, 1999;Fang *et al.*, 2006).

513

514 Altered NSG-driven nuclear translocation, and interaction with HSP90 may also  
515 affect GR nuclear export, and the duration of cellular response. Indeed, our washout  
516 studies showed a dramatic difference between the steroidal and NSG ligands, with  
517 marked reduction in GR export rate and prolongation of action seen with the NSGs,  
518 observed with both transfected reporter genes, and endogenous gene transcripts. A  
519 similar prolongation of action was seen in cells treated with geldanamycin which may  
520 result from stabilised GR-ligand interaction, due to altered engagement with HSP90,  
521 and its associated protein complex, including enzymes such as protein phosphatase 5  
522 (PP5). PP5 is responsible for removing phosphate modification from GR Ser211, and  
523 promoting GR nuclear export (DeFranco *et al.*, 1991;Silverstein *et al.*,  
524 1997;Galigniana *et al.*, 2002;Hinds, Jr. and Sanchez, 2008)(Fig. 7G).

525

526 Geldanamycin treatment resulted in loss of the Dex ligand-dependent GR Ser211  
527 phosphorylation. However NSG-liganded GR was not dephosphorylated under the  
528 same conditions, implying altered recruitment of PP5. PP5 also associates with  
529 HSP90 as part of the chaperone complex (Silverstein *et al.*, 1997;Hinds, Jr. *et al.*,  
530 2008) (Fig. 7G), and contains a peptidylprolyl isomerase domain that is capable of  
531 dynein interaction and therefore forming a bridge between the GR and the nuclear  
532 export machinery (DeFranco *et al.*, 1991;Galigniana *et al.*, 2002)(Fig. 7G).  
533 Therefore, as PP5 has been implicated in the nuclear export of the GR, the lack of  
534 dephosphorylation seen with NSG treatment is compatible with a broader change in  
535 protein recruitment with the NSG ligands. Interestingly, it was also observed that  
536 NSG treatment preserved GR protein expression compared with Dex treatment. This  
537 would further suggest that the conformation adopted by GR following NSG binding  
538 decouples protein recruitment required for terminating the GR transcriptional signal  
539 (Nawaz and O'Malley, 2004)(Fig 7G).

540

541 In conclusion we have identified two NSGs that bind to GR with high specificity but  
542 paradoxically result in profoundly slowed kinetics of cellular response. Analysis of  
543 the structural effects of these NSGs bound to GR suggests a change to the GR surface,  
544 through the movement of Arg611 in the ligand binding pocket of the GR, resulting in  
545 an alteration in the GR surface charge. The change in electrostatic charge is close to  
546 the known binding site for HSP90, and co-modulator proteins. This alteration carries  
547 with it the consequence of delayed GR phosphorylation and nuclear translocation,

548 which in turn results in delayed early Gc target gene regulation. The ability to  
549 manipulate the kinetics of GR activation by designing novel NSGs has implications  
550 for therapy, by targeting cellular pharmacodynamics rather than organismal  
551 pharmacokinetics.

552

### 553 **Acknowledgements**

554 We thank Bill Leavens and Midori Kayahara for technical assistance. Special thanks  
555 to Peter March and Roger Meadows for their help with the microscopy. Peter Trebble  
556 is supported by a BBSRC CASE studentship. Laura Matthews is supported by a  
557 FMHS Stepping Stones Fellowship. The Bioimaging Facility microscopes used in  
558 this study were purchased with grants from BBSRC, Wellcome and the University of  
559 Manchester Strategic Fund.

560

561  
562  
563

## REFERENCES

- 564 Barnes PJ (2011) Glucocorticosteroids: current and future directions. *Br J Pharmacol*,  
565 163, 29-43.
- 566 Berman H, Henrick K, Nakamura H, and Markley JL (2007) The worldwide Protein  
567 Data Bank (wwPDB): ensuring a single, uniform archive of PDB data. *Nucleic  
568 Acids Res*, 35, D301-D303.
- 569 Bledsoe RK, Montana VG, Stanley TB, Delves CJ, Apolito CJ, McKee DD, Consler  
570 TG, Parks DJ, Stewart EL, Willson TM, Lambert MH, Moore JT, Pearce KH, and  
571 Xu HE (2002) Crystal structure of the glucocorticoid receptor ligand binding  
572 domain reveals a novel mode of receptor dimerization and coactivator recognition.  
573 *Cell*, 110, 93-105.
- 574 Bledsoe RK, Stewart EL, and Pearce KH (2004) Structure and function of the  
575 glucocorticoid receptor ligand binding domain. *Vitam Horm*, 68, 49-91.
- 576 Caamano CA, Morano MI, Dalman FC, Pratt WB, and Akil H (1998) A conserved  
577 proline in the hsp90 binding region of the glucocorticoid receptor is required for  
578 hsp90 heterocomplex stabilization and receptor signaling. *J Biol Chem*, 273,  
579 20473-20480.
- 580 Canalis E, Pereira RC, and Delany AM (2002) Effects of glucocorticoids on the  
581 skeleton. *J Pediatr Endocrinol Metab*, 15 Suppl 5, 1341-1345.
- 582 Cerasoli F, Jr. (2006) Developing the ideal inhaled corticosteroid. *Chest*, 130, 54S-  
583 64S.
- 584 Chen W, Rogatsky I, and Garabedian MJ (2006) MED14 and MED1 differentially  
585 regulate target-specific gene activation by the glucocorticoid receptor. *Mol  
586 Endocrinol*, 20, 560-572.
- 587 Chen W, Dang T, Blind RD, Wang Z, Cavasotto CN, Hittelman AB, Rogatsky I,  
588 Logan SK, and Garabedian MJ (2008) Glucocorticoid Receptor Phosphorylation  
589 Differentially Affects Target Gene Expression. *Mol Endocrinol*, 22, 1754-1766.
- 590 Conway-Campbell BL, George CL, Pooley JR, Knight DM, Norman MR, Hager GL,  
591 and Lightman SL (2011) The HSP90 molecular chaperone cycle regulates cyclical  
592 transcriptional dynamics of the glucocorticoid receptor and its coregulatory  
593 molecules CBP/p300 during ultradian ligand treatment. *Mol Endocrinol*, 25, 944-  
594 954.
- 595 Czar MJ, Owens-Grillo JK, Yem AW, Leach KL, Deibel MR, Jr., Welsh MJ, and  
596 Pratt WB (1994) The hsp56 immunophilin component of untransformed steroid  
597 receptor complexes is localized both to microtubules in the cytoplasm and to the  
598 same nonrandom regions within the nucleus as the steroid receptor. *Mol  
599 Endocrinol*, 8, 1731-1741.

- 600 Davies TH, Ning YM, and Sanchez ER (2002) A new first step in activation of steroid  
601 receptors: hormone-induced switching of FKBP51 and FKBP52 immunophilins. *J*  
602 *Biol Chem*, 277, 4597-4600.
- 603 De IS, Franca R, Martelossi S, Ventura A, and Decorti G (2011) Molecular  
604 mechanism of glucocorticoid resistance in inflammatory bowel disease. *World J*  
605 *Gastroenterol*, 17, 1095-1108.
- 606 DeFranco DB, Qi M, Borrer KC, Garabedian MJ, and Brautigan DL (1991) Protein  
607 phosphatase types 1 and/or 2A regulate nucleocytoplasmic shuttling of  
608 glucocorticoid receptors. *Mol Endocrinol*, 5, 1215-1228.
- 609 Echeverria PC, Mazaira G, Erlejman A, Gomez-Sanchez C, Piwien PG, and  
610 Galigniana MD (2009) Nuclear import of the glucocorticoid receptor-hsp90  
611 complex through the nuclear pore complex is mediated by its interaction with  
612 Nup62 and importin beta. *Mol Cell Biol*, 29, 4788-4797.
- 613 Encio IJ and tera-Wadleigh SD (1991) The genomic structure of the human  
614 glucocorticoid receptor. *J Biol Chem*, 266, 7182-7188.
- 615 Fang L, Ricketson D, Getubig L, and Darimont B (2006) Unliganded and hormone-  
616 bound glucocorticoid receptors interact with distinct hydrophobic sites in the  
617 Hsp90 C-terminal domain. *Proc Natl Acad Sci U S A*, 103, 18487-18492.
- 618 Ford J, McEwan IJ, Wright AP, and Gustafsson JA (1997) Involvement of the  
619 transcription factor IID protein complex in gene activation by the N-terminal  
620 transactivation domain of the glucocorticoid receptor in vitro. *Mol Endocrinol*, 11,  
621 1467-1475.
- 622 Galigniana MD, Harrell JM, Murphy PJ, Chinkers M, Radanyi C, Renoir JM, Zhang  
623 M, and Pratt WB (2002) Binding of hsp90-associated immunophilins to  
624 cytoplasmic dynein: direct binding and in vivo evidence that the peptidylprolyl  
625 isomerase domain is a dynein interaction domain. *Biochemistry*, 19;41, 13602-  
626 13610.
- 627 Galigniana MD, Scruggs JL, Herrington J, Welsh MJ, Carter-Su C, Housley PR, and  
628 Pratt WB (1998) Heat shock protein 90-dependent (geldanamycin-inhibited)  
629 movement of the glucocorticoid receptor through the cytoplasm to the nucleus  
630 requires intact cytoskeleton. *Mol Endocrinol*, 12, 1903-1913.
- 631 Galliher-Beckley AJ, Williams JG, Collins JB, and Cidlowski JA (2008) Glycogen  
632 synthase kinase 3beta-mediated serine phosphorylation of the human  
633 glucocorticoid receptor redirects gene expression profiles. *Mol Cell Biol*, 28, 7309-  
634 7322.
- 635 Grad I and Picard D (2007) The glucocorticoid responses are shaped by molecular  
636 chaperones. *Mol Cell Endocrinol*, 275, 2-12.
- 637 Harrell JM, Murphy PJ, Morishima Y, Chen H, Mansfield JF, Galigniana MD, and  
638 Pratt WB (2004) Evidence for glucocorticoid receptor transport on microtubules by  
639 dynein. *J Biol Chem*, 279, 54647-54654.

- 640 Heery DM, Kalkhoven E, Hoare S, and Parker MG (1997) A signature motif in  
641 transcriptional co-activators mediates binding to nuclear receptors. *Nature*, 387,  
642 733-736.
- 643 Hinds TD, Jr. and Sanchez ER (2008) Protein phosphatase 5. *Int J Biochem Cell Biol*,  
644 40, 2358-2362.
- 645 Hollenberg SM, Weinberger C, Ong ES, Cerelli G, Oro A, Lebo R, Thompson EB,  
646 Rosenfeld MG, and Evans RM (1985) Primary structure and expression of a  
647 functional human glucocorticoid receptor cDNA. *Nature*, 318, 635-641.
- 648 Ismaili N and Garabedian MJ (2004) Modulation of glucocorticoid receptor function  
649 via phosphorylation. *Ann N Y Acad Sci*, 1024, 86-101.
- 650 Ito K, Yamamura S, Essilfie-Quaye S, Cosio B, Ito M, Barnes PJ, and Adcock IM  
651 (2006) Histone deacetylase 2-mediated deacetylation of the glucocorticoid receptor  
652 enables NF-kappaB suppression. *J Exp Med*, 203, 7-13.
- 653 Izumo M, Johnson CH, and Yamazaki S (2003) Circadian gene expression in  
654 mammalian fibroblasts revealed by real-time luminescence reporting: temperature  
655 compensation and damping. *Proc Natl Acad Sci U S A*, 100, 16089-16094.
- 656 Johnson TA, Elbi C, Parekh BS, Hager GL, and John S (2008) Chromatin remodeling  
657 complexes interact dynamically with a glucocorticoid receptor-regulated promoter.  
658 *Mol Biol Cell*, 19, 3308-3322.
- 659 Jones PL and Shi YB (2003) N-CoR-HDAC corepressor complexes: roles in  
660 transcriptional regulation by nuclear hormone receptors. *Curr Top Microbiol*  
661 *Immunol*, 274, 237-268.
- 662 Kakar M, Kanwal C, Davis JR, Li H, and Lim CS (2006) Geldanamycin, an inhibitor  
663 of Hsp90, blocks cytoplasmic retention of progesterone receptors and  
664 glucocorticoid receptors via their respective ligand binding domains. *AAPS J*, 8,  
665 E718-E728.
- 666 Kang KI, Meng X, vin-Leclerc J, Bouhouche I, Chadli A, Cadepond F, Baulieu EE,  
667 and Catelli MG (1999) The molecular chaperone Hsp90 can negatively regulate the  
668 activity of a glucocorticosteroid-dependent promoter. *Proc Natl Acad Sci U S A*,  
669 96, 1439-1444.
- 670 Kauppi B, Jakob C, Farnegardh M, Yang J, Ahola H, Alarcon M, Calles K, Engstrom  
671 O, Harlan J, Muchmore S, Ramqvist AK, Thorell S, Ohman L, Greer J, Gustafsson  
672 JA, Carlstedt-Duke J, and Carlquist M (2003) The three-dimensional structures of  
673 antagonistic and agonistic forms of the glucocorticoid receptor ligand-binding  
674 domain: RU-486 induces a transconformation that leads to active antagonism. *J*  
675 *Biol Chem*, 278, 22748-22754.
- 676 Krishnan JA, Davis SQ, Naureckas ET, Gibson P, and Rowe BH (2009) An umbrella  
677 review: corticosteroid therapy for adults with acute asthma. *Am J Med*, 122, 977-  
678 991.



- 679 Kumar R, Lee JC, Bolen DW, and Thompson EB (2001) The conformation of the  
680 glucocorticoid receptor af1/tau1 domain induced by osmolyte binds co-regulatory  
681 proteins. *J Biol Chem*, 276, 18146-18152.
- 682 Lin CW, Nakane M, Stashko M, Falls D, Kuk J, Miller L, Huang R, Tyree C, Miner  
683 JN, Rosen J, Kym PR, Coghlan MJ, Carter G, and Lane BC (2002) trans-  
684 Activation and Repression Properties of the Novel Nonsteroid Glucocorticoid  
685 Receptor Ligand 2,5-Dihydro-9-hydroxy-10-methoxy-2,2,4-trimethyl-5-(1-  
686 methylcyclohexen-3-yl)-1H-[1]benzopyrano[3,4-f]quinoline (A276575) and Its  
687 Four Stereoisomers. *Mol Pharmacol*, 62, 297-303.
- 688 Livak KJ and Schmittgen TD (2001) Analysis of relative gene expression data using  
689 real-time quantitative PCR and the 2(-Delta Delta C(T)) Method. *Methods*, 25,  
690 402-408.
- 691 Madauss KP, Bledsoe RK, Mclay I, Stewart EL, Uings IJ, Weingarten G, and  
692 Williams SP (2008) The first X-ray crystal structure of the glucocorticoid receptor  
693 bound to a non-steroidal agonist. *Bioorg Med Chem Lett*, 18, 6097-6099.
- 694 Matthews L, Berry A, Ohanian V, Ohanian J, Garside H, and Ray D (2008) Caveolin  
695 Mediates Rapid Glucocorticoid Effects and Couples Glucocorticoid Action to the  
696 Antiproliferative Program. *Mol Endocrinol*, 22, 1320-1330.
- 697 Matthews L, Berry A, Tersigni M, D'Acquisto F, Ianaro A, and Ray D (2009)  
698 Thiazolidinediones Are Partial Agonists for the Glucocorticoid Receptor.  
699 *Endocrinology*, 150, 75-86.
- 700 Matthews L, Johnson J, Berry A, Trebble P, Cookson A, Spiller D, Rivers C, Norman  
701 M, White M, and Ray D (2011) Cell cycle phase regulates glucocorticoid receptor  
702 function. *PLoS One*, 6, e22289.
- 703 McMaster A, Chambers T, Meng QJ, Grundy S, Loudon AS, Donn R, and Ray DW  
704 (2008) Real-time analysis of gene regulation by glucocorticoid hormones. *J*  
705 *Endocrinol*, 197, 205-211.
- 706 McMaster A and Ray DW (2007) Modelling the glucocorticoid receptor and  
707 producing therapeutic agents with anti-inflammatory effects but reduced side-  
708 effects. *Exp Physiol*, 92, 299-309.
- 709 McMaster A and Ray DW (2008) Drug Insight: selective agonists and antagonists of  
710 the glucocorticoid receptor. *Nat Clin Pract End Met*, 4, 91-101.
- 711 Meng QJ, McMaster A, Beesley S, Lu WQ, Gibbs J, Parks D, Collins J, Farrow S,  
712 Donn R, Ray D, and Loudon A (2008) Ligand modulation of REV-ERBalpha  
713 function resets the peripheral circadian clock in a phasic manner. *J Cell Sci*, 121,  
714 3629-3635.
- 715 Nawaz Z and O'Malley BW (2004) Urban renewal in the nucleus: is protein turnover  
716 by proteasomes absolutely required for nuclear receptor-regulated transcription?  
717 *Mol Endocrinol*, 18, 493-499.

- 718 Nishi M, Takenaka N, Morita N, Ito T, Ozawa H, and Kawata M (1999) Real-time  
719 imaging of glucocorticoid receptor dynamics in living neurons and glial cells in  
720 comparison with non-neural cells. *Eur J Neurosci*, 11, 1927-1936.
- 721 Picard D and Yamamoto KR (1987) Two signals mediate hormone-dependent nuclear  
722 localization of the glucocorticoid receptor. *EMBO J*, 6, 3333-3340.
- 723 Rasband WS. Image J. 1997. National Institutes of Health, Bethesda, Maryland,  
724 USA. 1997.  
725 Ref Type: Computer Program
- 726 Ricketson D, Hostick U, Fang L, Yamamoto KR, and Darimont BD (2007) A  
727 conformational switch in the ligand-binding domain regulates the dependence of  
728 the glucocorticoid receptor on Hsp90. *J Mol Biol*, 368, 729-741.
- 729 Schett G, Stach C, Zwerina J, Voll R, and Manger B (2008) How antirheumatic drugs  
730 protect joints from damage in rheumatoid arthritis. *Arthritis Rheum*, 58, 2936-  
731 2948.
- 732 Schrodinger. Glide version 5.5. 2009. New York, NY, Schrodinger LLC.  
733 Ref Type: Computer Program
- 734 Schrodinger. Maestro version 9.3. 2012. New York, NY, Schrodinger LLC.  
735 Ref Type: Computer Program
- 736 Segnitz B and Gehring U (1997) The function of steroid hormone receptors is  
737 inhibited by the hsp90-specific compound geldanamycin. *J Biol Chem*, 272,  
738 18694-18701.
- 739 Silverstein AM, Galigniana MD, Chen MS, Owens-Grillo JK, Chinkers M, and Pratt  
740 WB (1997) Protein phosphatase 5 is a major component of glucocorticoid  
741 receptor.hsp90 complexes with properties of an FK506-binding immunophilin. *J*  
742 *Biol Chem*, 272, 16224-16230.
- 743 Stavreva DA, Muller WG, Hager GL, Smith CL, and McNally JG (2004) Rapid  
744 glucocorticoid receptor exchange at a promoter is coupled to transcription and  
745 regulated by chaperones and proteasomes. *Mol Cell Biol*, 24, 2682-2697.
- 746 Stevens A, Garside H, Berry A, Waters C, White A, and Ray D (2003) Dissociation of  
747 steroid receptor coactivator 1 and nuclear receptor corepressor recruitment to the  
748 human glucocorticoid receptor by modification of the ligand-receptor interface: the  
749 role of tyrosine 735. *Mol Endocrinol*, 17, 845-859.
- 750 Tago K, Tsukahara F, Naruse M, Yoshioka T, and Takano K (2004) Regulation of  
751 nuclear retention of glucocorticoid receptor by nuclear Hsp90. *Mol Cell*  
752 *Endocrinol*, 213, 131-138.
- 753 van Lierop MJ, Alkema W, Laskewitz AJ, Dijkema R, van der Maaden HM, Smit MJ,  
754 Plate R, Conti PG, Jans CG, Timmers CM, van Boeckel CA, Lusher SJ, McGuire  
755 R, van Schaik RC, de VJ, Smeets RL, Hofstra CL, Boots AM, van DM, Ingelse  
756 BA, Schoonen WG, Grefhorst A, van Dijk TH, Kuipers F, and Dokter WH (2012)  
757 Org 214007-0: a novel non-steroidal selective glucocorticoid receptor modulator



- 758 with full anti-inflammatory properties and improved therapeutic index. *PLoS One*,  
759 7, e48385.
- 760 Wang JC, Shah N, Pantoja C, Meijssing SH, Ho JD, Scanlan TS, and Yamamoto KR  
761 (2006) Novel arylpyrazole compounds selectively modulate glucocorticoid  
762 receptor regulatory activity. *Genes Dev*, 20, 689-699.
- 763 Wang Z, Frederick J, and Garabedian MJ (2002) Deciphering the phosphorylation  
764 "code" of the glucocorticoid receptor in vivo. *J Biol Chem*, 277, 26573-26580.
- 765 Warnmark A, Gustafsson JA, and Wright AP (2000) Architectural principles for the  
766 structure and function of the glucocorticoid receptor tau 1 core activation domain.  
767 *J Biol Chem*, 275, 15014-15018.
- 768 Yamazaki S and Takahashi JS (2005) Real-time luminescence reporting of circadian  
769 gene expression in mammals. *Methods Enzymol*, 393:288-301., 288-301.  
770  
771  
772

773 **Figure legends**

774

775 **Fig. 1: GSK47867A and GSK47869A are highly potent GR agonists.**

776 Structure of steroidal and non steroidal Gc (A). HeLa cells were transfected with a  
 777 positive GR reporter gene (TAT3-luc) (B) or with a glucocorticoid repressed NFκB  
 778 reporter gene (NRE-luc) (C). Twenty four hours post-transfection, NRE-Luc  
 779 transfected cells were pre-treated with TNF α (0.5 ng/ml) for thirty minutes.  
 780 Subsequently all transfected cells were treated with 0.01-1000 nM Dex,  
 781 Hydrocortisone (HC), GSK47867A [67A] or GSK47869A [69A] for eighteen hours  
 782 then lysed and subjected to analysis by luciferase assay. Graph (mean ± SD) show the  
 783 relative light units (RLU) (B) or % inhibition (C) from one of three representative  
 784 experiments performed in triplicate.

785

786 **Fig. 2: Dex and GSK47867A binding induces different GR LBD structure.**

787 Comparison of the crystal structures of the GR LBD bound to Dex (A, purple) and  
 788 GSK47867A [67A] (B, blue). The residues in the binding pocket that show significant  
 789 movement upon 67A binding are highlighted in yellow. When 67A binds to the GR  
 790 LBD the head region causes movement of residues Gln570, Met604 and Arg611 (D)  
 791 when compared to Dex (C).

792

793 **Fig. 3: GR LBD surface charge is altered by GSK47867A binding.**

794 The region of the GR LBD surface where residues Gln570, Met604 and Arg611 are  
 795 exposed is highlighted (A, with Dex in purple and C, GSK47867A [67A] in blue). A  
 796 close up of this region is shown with an electrostatic charge map (B, D) reveals the  
 797 creation of a patch of positive surface charge due to the movement of Arg611 upon  
 798 67A binding.

799

800 **Fig. 4: GSK47867A and GSK47869A induce slow kinetics of GR activation.**

801 HeLa cells were treated with DMSO vehicle, 100 nM Dex, 3 nM GSK47867A [67A]  
 802 or 3 nM GSK47869A [69A] for one, four or twenty four hours then lysed and RNA  
 803 extracted using an RNeasy kit. RNA was reverse transcribed and subjected to qPCR  
 804 of FKBP5 (A) and GILZ (B) using Sybr Green detection in an ABI q-PCR machine  
 805 and data analysed by  $\delta\delta$  CT method. Graphs (mean ± SEM) combine data from three  
 806 separate experiments and display fold change over vehicle treated control. Following  
 807 transfection with HaloTag-GR HeLa cells were incubated with 100 nM Dex, 3 nM  
 808 FP, 3 nM 67A or 69A. (C) Cells were imaged in real time at 37°C to determine the  
 809 subcellular localisation of the GR (white) at the times indicated. Scale bar, 25 μm.  
 810 Images are representative of three independent experiments. (D) HeLa cells  
 811 transfected with a TAT3-Luc reporter plasmid were treated with 100 nM Dex, 3 nM  
 812 FP, 3 nM 67A or 69A for up to twenty four hours. The production of luciferase was  
 813 tracked by measuring the relative light units (RLU) emitted from each sample, graph  
 814 D tracks RLU production over the first five hours following addition of treatment.  
 815 Graph is representative of three separate experiments. The time taken to reach half the  
 816 maximal light output was measured for all treatments (E). Statistical significance was  
 817 evaluated by one way ANOVA followed by Tukey post-test. Asterisks indicate: \* $p$  <  
 818 0.005 significantly different from control, \*\* $p$  < 0.001 significantly different from  
 819 Dex.

820

821 **Fig. 5: GSK47867A and GSK47869A rapidly accumulate in cells.**

822 A549 cells were treated with 10  $\mu$ M Dex, FP, GSK47867A [67A] or GSK47869A  
 823 [69A] for ten minutes and subsequently washed and lysed. The cell samples were  
 824 analysed for ligand uptake by mass spectrometry (A). HeLa cells were treated with  
 825 DMSO vehicle, 100 nM Dex, 3 nM 67A or 3 nM 69A either for four hours or for ten  
 826 minutes followed by washout and cultured in ligand free media for four hours.  
 827 Subsequently cells were lysed and RNA extracted using an RNeasy kit. RNA was  
 828 reverse transcribed and subjected to qPCR of GILZ (B), FKBP5 (C) and IGFBP1 (D)  
 829 using Sybr Green detection in an ABI q-PCR machine and data analysed by  $\delta\delta$  CT  
 830 method. Graphs (mean  $\pm$  SEM) combine data from three separate experiments and  
 831 display percentage induction compared to equivalent four hour constant treatment.  
 832 Following transfection with HaloTag-GR HeLa cells were placed on ice for ten  
 833 minutes and subsequently incubated with 100 nM Dex, 3 nM FP, 3 nM 67A or 69A  
 834 for one hour on ice. Following treatment cells were imaged in real time at 37°C to  
 835 determine the subcellular localisation of the GR (white, E). Scale bar, 25 $\mu$ m. Graph F  
 836 displays average time to exclusively nuclear GR following 1 hour with ligand on ice,  
 837 calculated from three separate experiments. Statistical significance was evaluated by  
 838 one way ANOVA followed by Tukey post-test. Asterisks indicate: \* $p < 0.001$   
 839 significantly different from Dex.

840

841 **Fig. 6: Mutation of Met604 in GR-LBD impairs HSP90-GR interaction and**  
 842 **microtubule stability regulates GR translocation.**

843 (A) The ribbon structure of the GR LBD bound to Dex. The residues highlighted in  
 844 yellow were identified by Ricketson *et al* as important for GR and HSP90 interaction.  
 845 The region of the GR LBD surface where the NSGs cause an alteration in surface  
 846 charge is shown in panel B. The region of the GR LBD surface where Met604 is  
 847 exposed is highlighted in panel C in yellow. This area overlaps the region identified  
 848 as having altered surface charge upon binding NSG, supporting the lack of HSP90  
 849 engagement with NSG treatment. (D) Untreated HeLa cells with GFP labelled  
 850 microtubules. Incubation for 1 hour with 2  $\mu$ M colcemid disrupts the microtubule  
 851 network (E). Following transfection with a halo tagged GR, HeLa cells were incubated  
 852 with 2  $\mu$ M Colcemid for 1 hour then subsequently co treated with 100 nM  
 853 Dexamethasone, 3 nM FP, GSK47867A [67A] or GSK47869A (F). Cells were  
 854 imaged in real time and analysed for subcellular localisation of the GR (white). Scale  
 855 bar, 25 $\mu$ m. Graph G shows the average time to exclusively nuclear GR. Statistical  
 856 significance was evaluated by one way ANOVA followed by Tukey post-test.  
 857 Asterisks indicate: \*  $p < 0.005$  significantly different from treatment without colcemid

858

859 **Fig. 7: Antagonism of HSP90 has less impact on the activity of NSG ligands**

860 HeLa cells transfected with a TAT3-Luc reporter plasmid were treated with 100 nM  
 861 Dex, 3 nM GSK47867A [67A] or 3 nM GSK47869A [69A] for twenty four hours.  
 862 Subsequently cells were either co treated with 10 mM geldanamycin (D) or washed  
 863 and placed in serum free recording media (A) for a further twenty four hours. The  
 864 production of luciferase was tracked by measuring the relative light units (RLU)  
 865 emitted from each sample. Graphs tracks RLU production for twenty four hours  
 866 following GA addition or ligand removal. Graphs are representative of three separate  
 867 experiments. HeLa cells were treated with DMSO vehicle, 100 nM Dex, 3 nM FP,  
 868 3nM 67A or 3 nM 69A for twenty four hours or one hour followed by washes and  
 869 then cultured in ligand free media for twenty four hours. Subsequently cells were  
 870 lysed and RNA extracted using an RNeasy kit. RNA was reverse transcribed and  
 871 subjected to qPCR of GILZ (B) and FKBP5 (C) using Sybr Green detection in an ABI

872 q-PCR machine and data analysed by  $\delta\delta$  CT method. Graphs (mean  $\pm$  SEM) combine  
873 data from three separate experiments and display percentage induction compared to  
874 equivalent twenty four hour constant treatment. HeLa cells were treated with 100 nM  
875 Dex, 3 nM 67A or 69A for 2 hours and then co treated with 10 mM GA for a further  
876 two hours (E) or twenty two hours (F), where a constant four hour or twenty four hour  
877 treatment was used as a comparison. Following incubation with treatments cells were  
878 lysed in RIPA buffer containing phosphatase and protease inhibitors and analysed by  
879 immunoblotting for GR abundance and GR ser 211 phosphorylation.  $\alpha$ -Tubulin was  
880 used as a loading control. Mechanism of GR action (G). Upon binding Gc (1) the GR  
881 interacts with the translocation machinery enabling nuclear import (2). In the nucleus  
882 GR binds to cis-elements to activate or repress target gene expression (3). The GR  
883 undergoes dynamic cycles of dissociation, and re-binding of ligand, which occurs in a  
884 HSP90 dependent manner (4). Interaction with PP5 facilitates nuclear export of the  
885 GR (5) enabling it to be recycled or targeted for degradation by the proteasome (6).  
886 Statistical significance was evaluated by one way ANOVA followed by Tukey post-  
887 test. Asterisks indicate: \* $p < 0.01$  significantly different from both Dex and FP.  
888

A

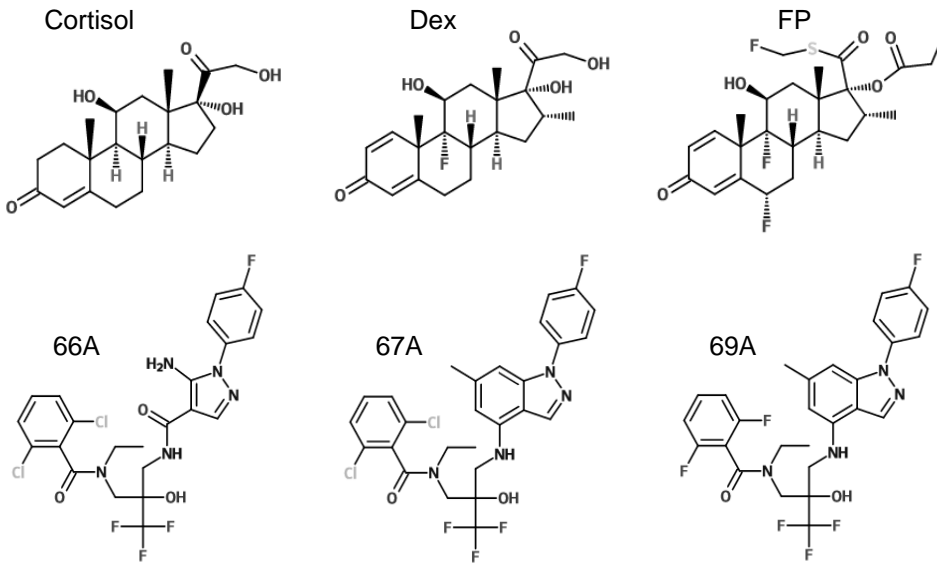

B

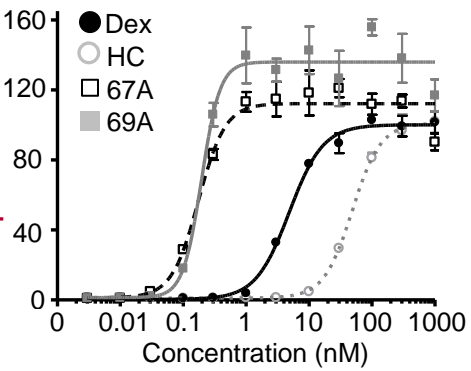

C

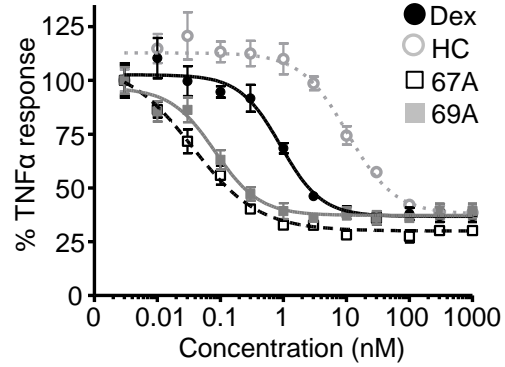

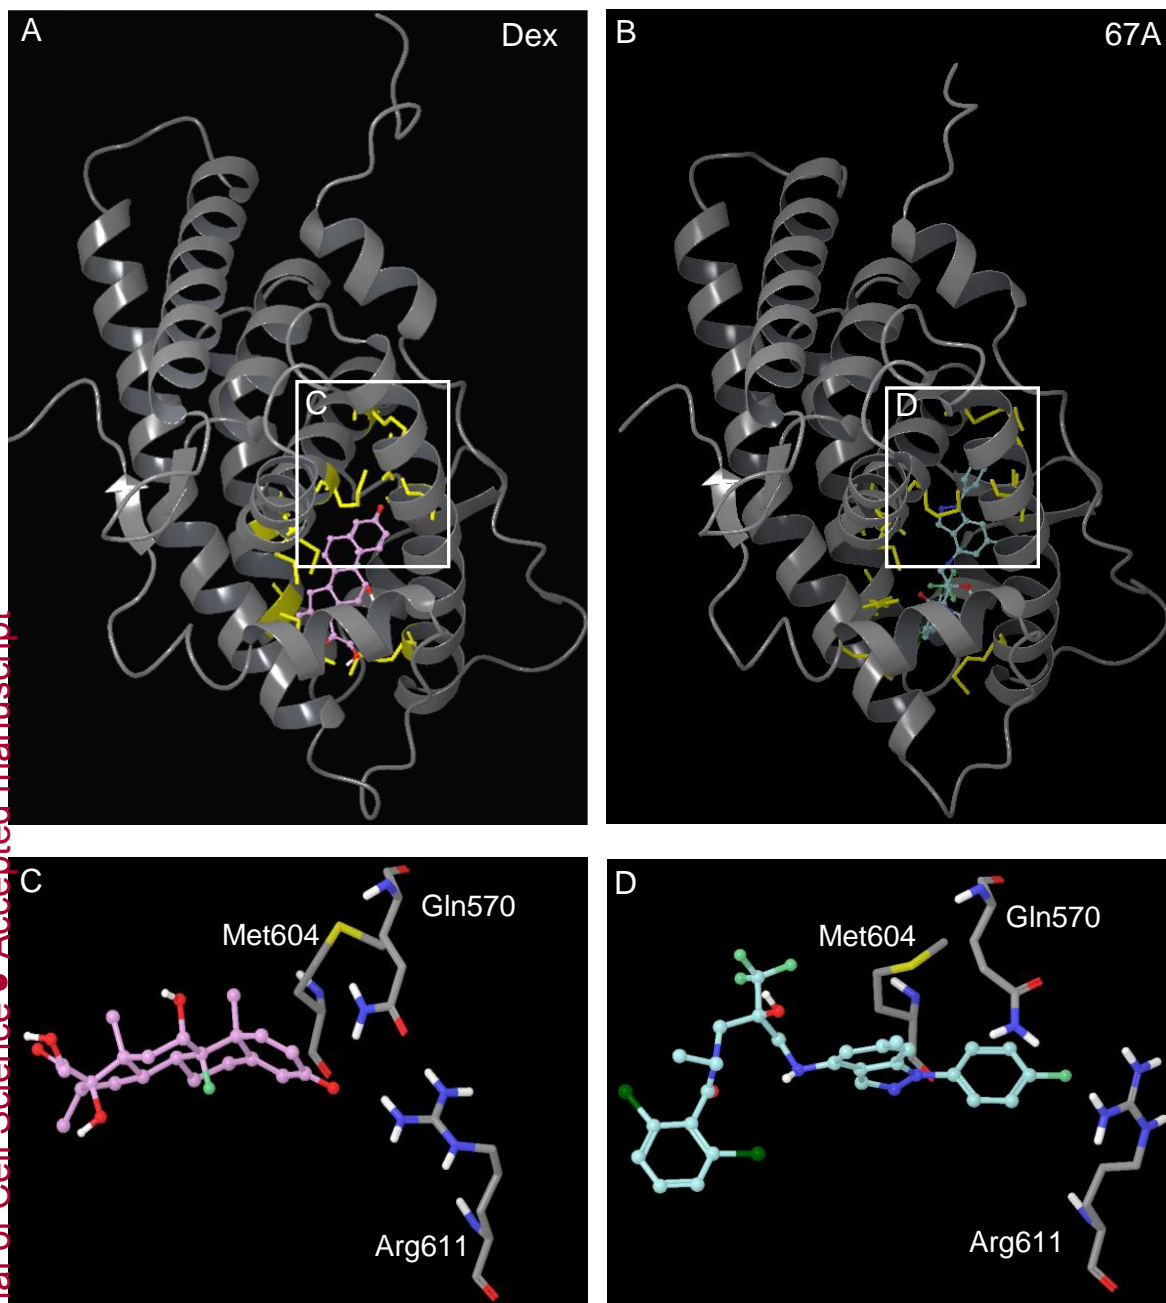



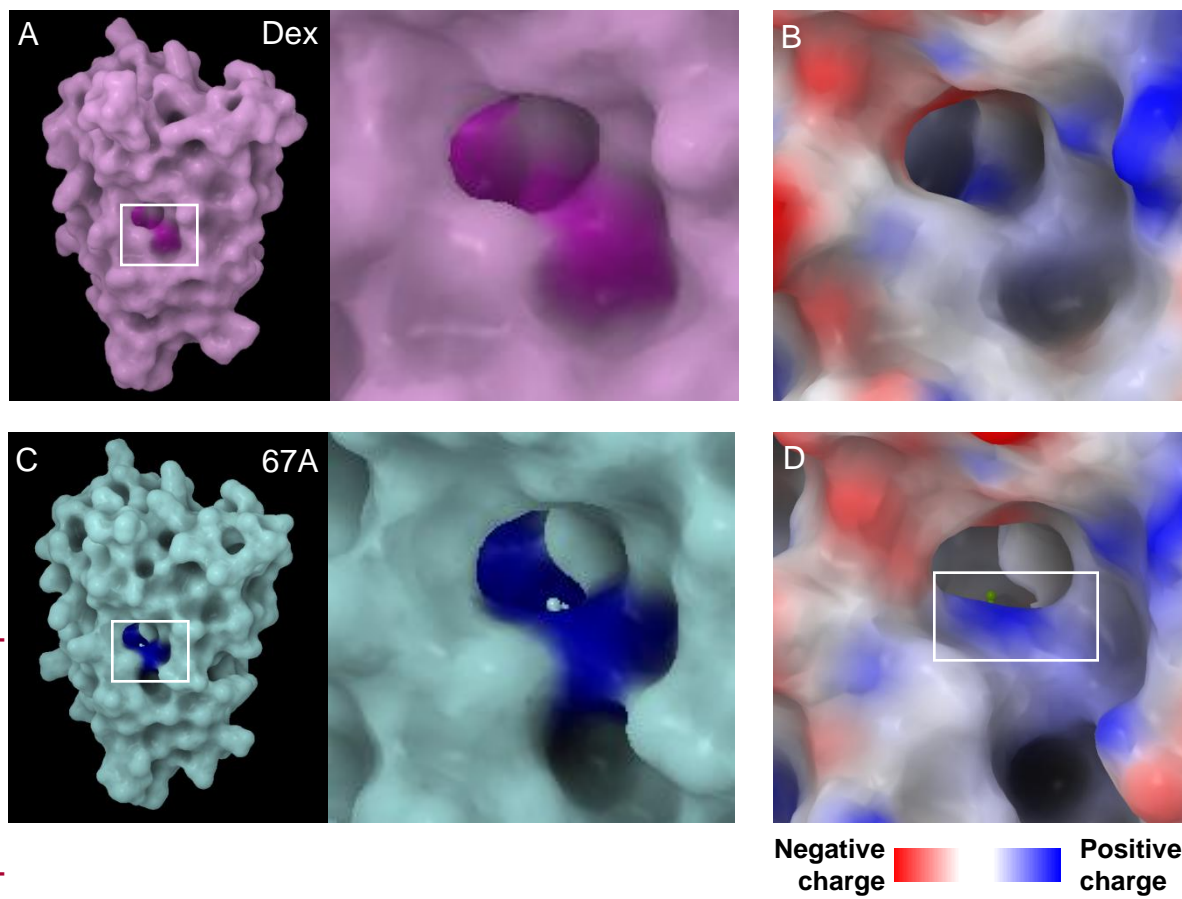

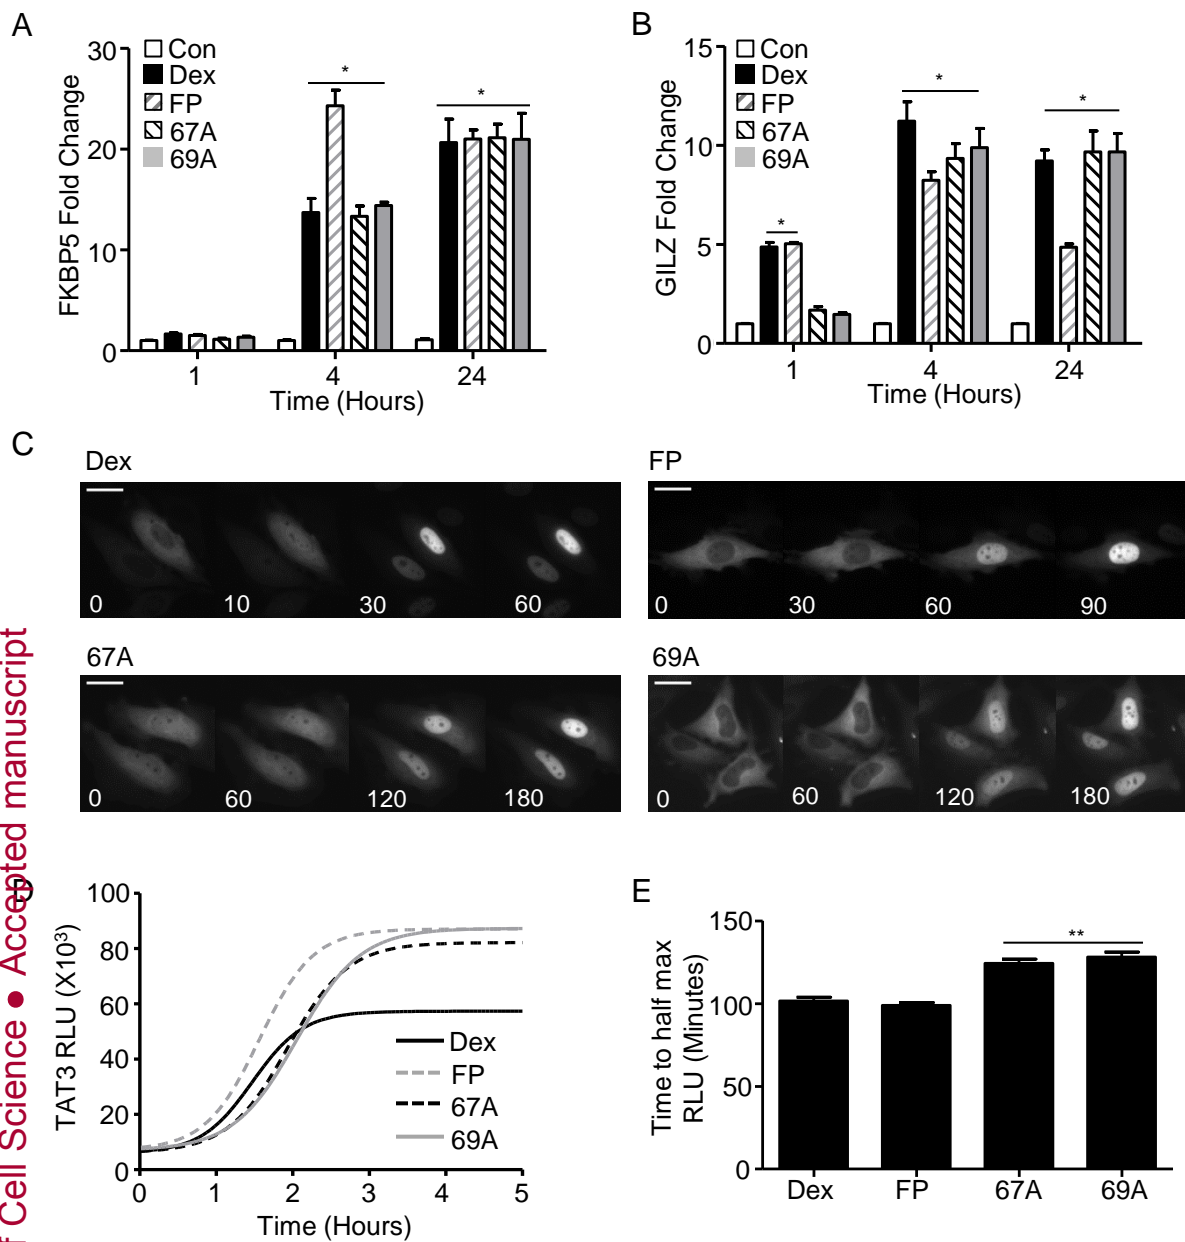



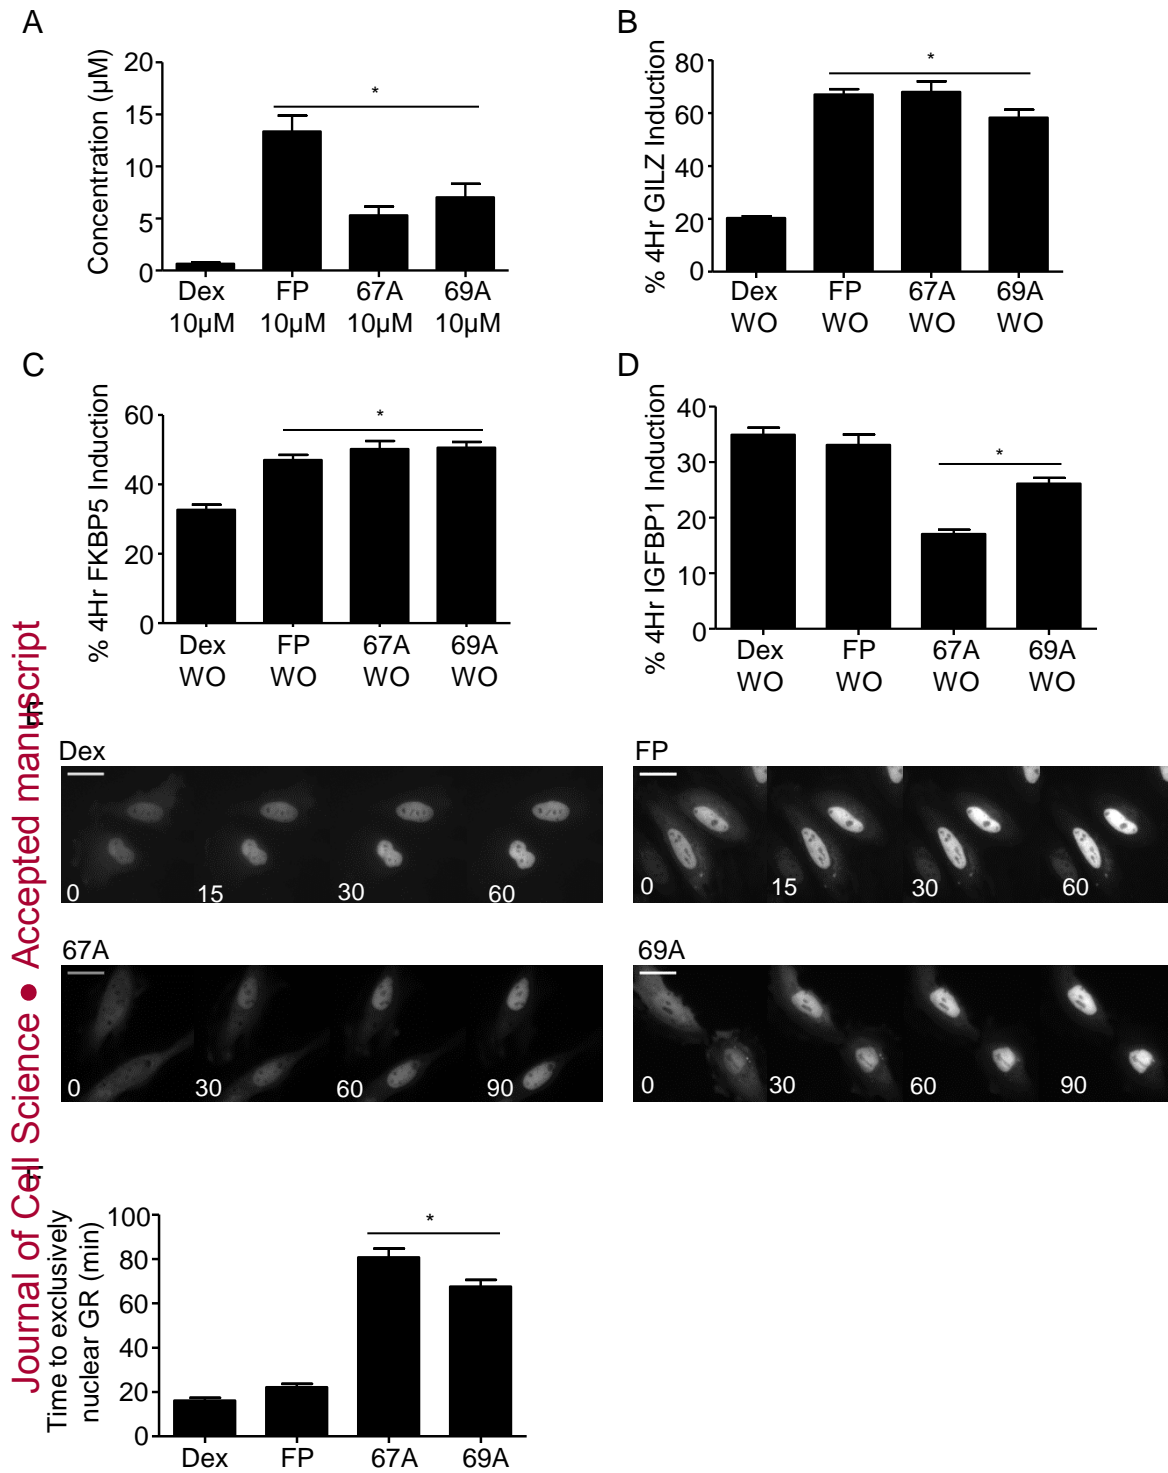

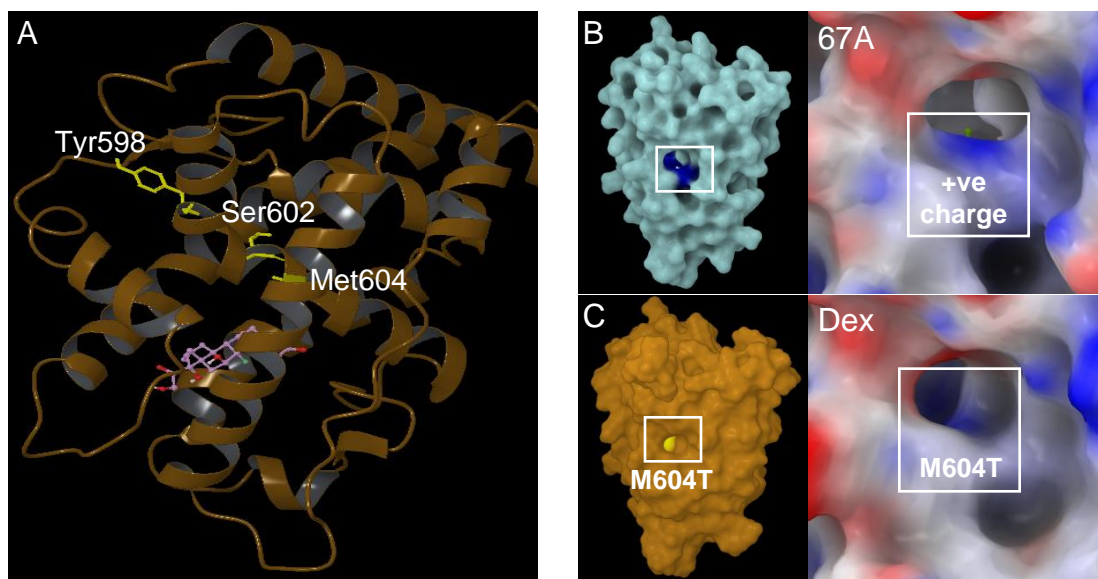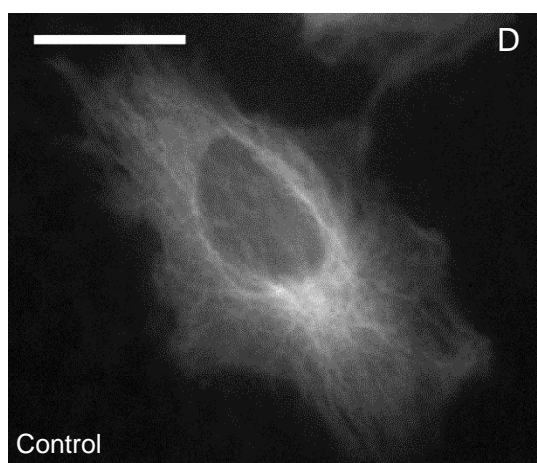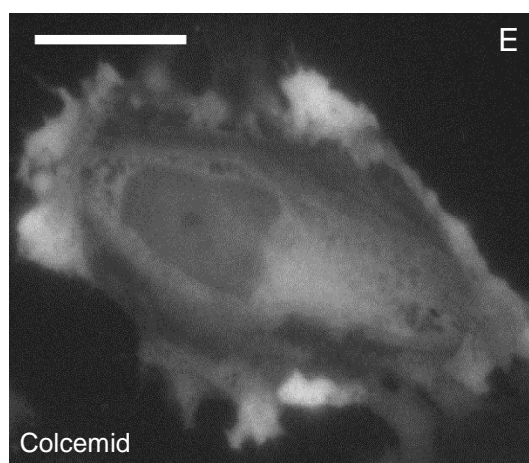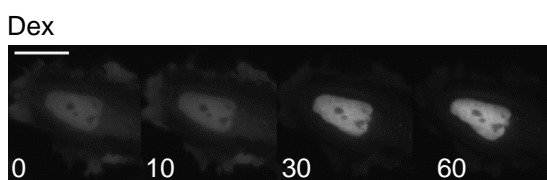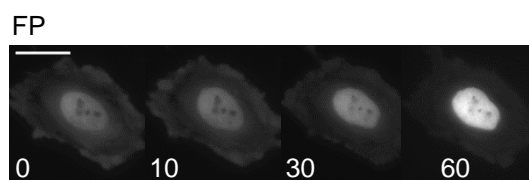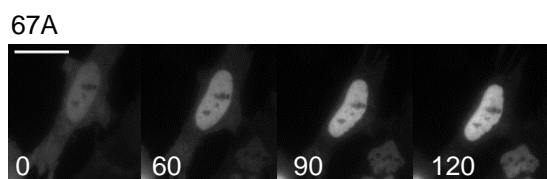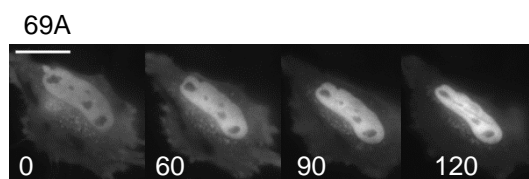

**G**

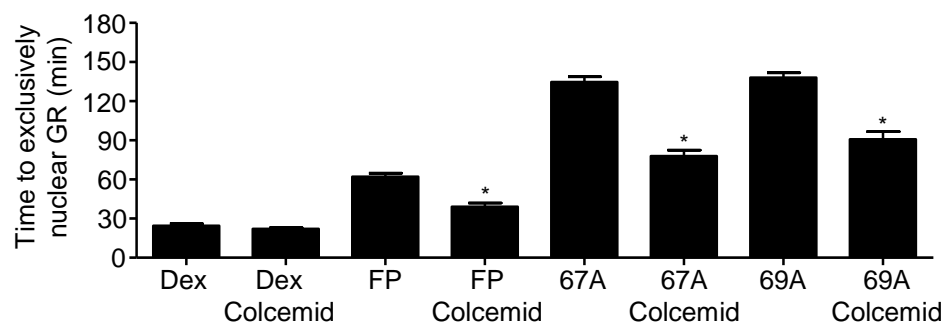

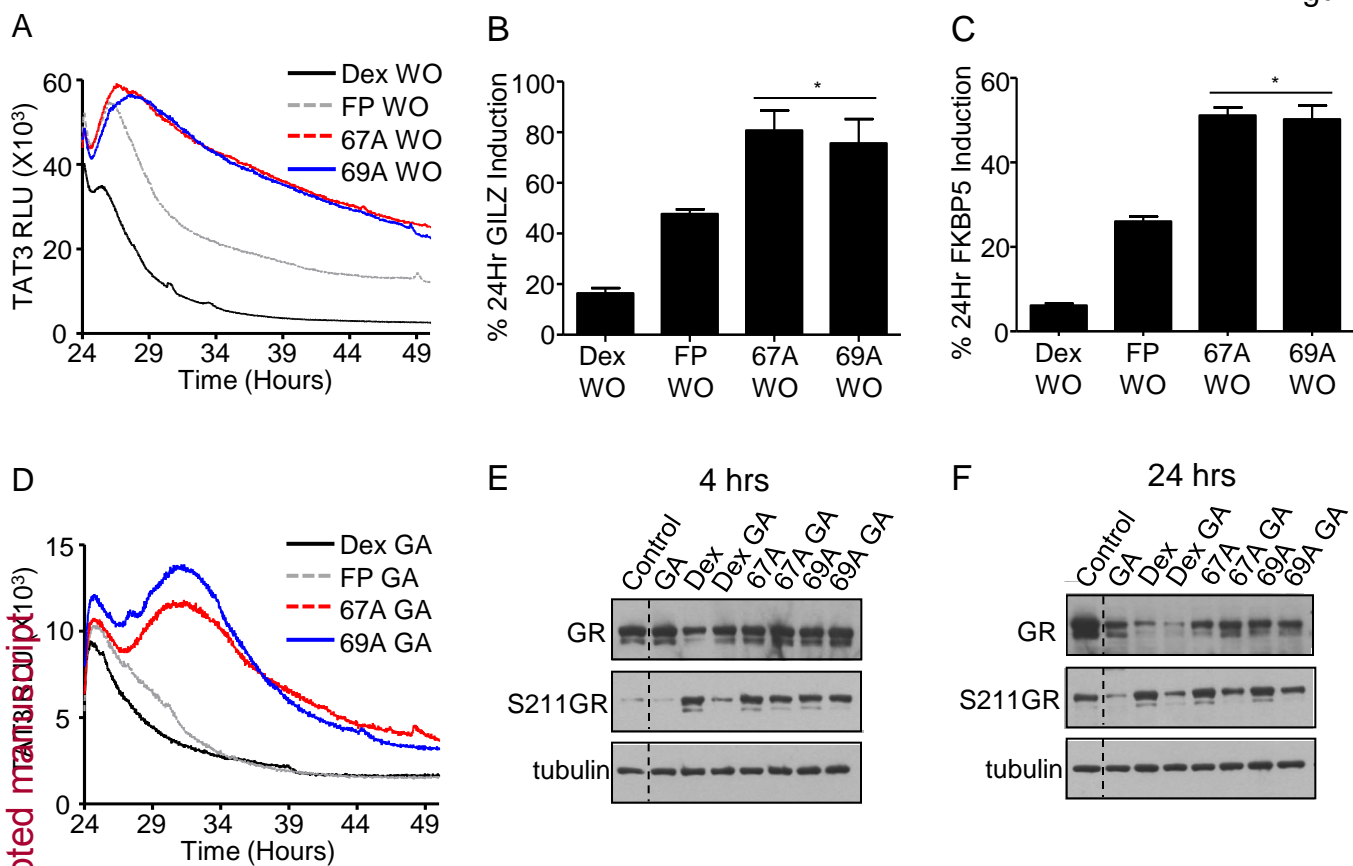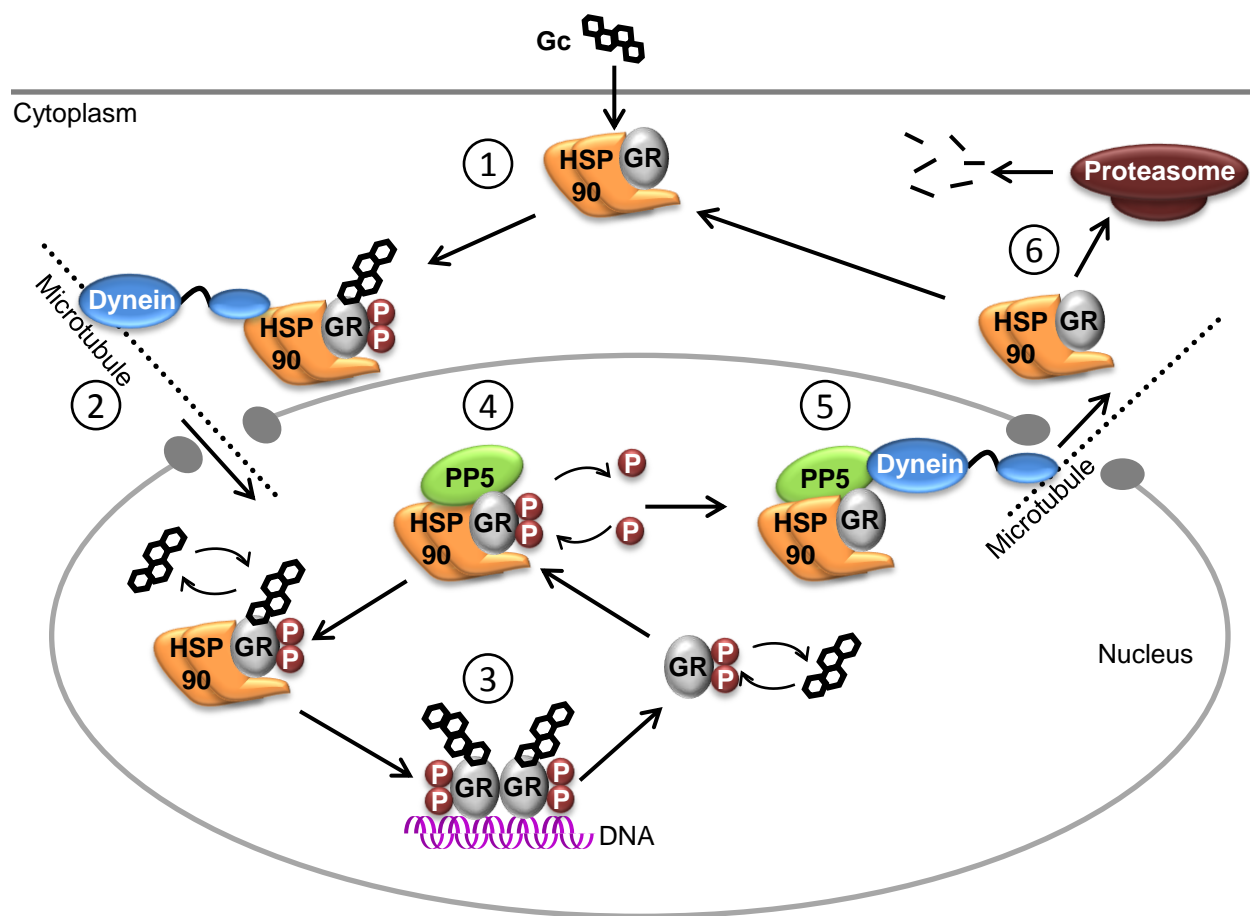

**Table 1: Saturating concentration of ligands calculated from EC50.**

|                  | Dex     | 67A      | 69A      |
|------------------|---------|----------|----------|
| Average EC50     | 6.26    | 0.29     | 0.28     |
| StDev            | +/- 3.8 | +/- 0.13 | +/- 0.06 |
| 10x (EC50+StDev) | 100nM   | 3nM      | 3nM      |
